# Supplementary material for: Preparation and application of a novel mixed-mode monolith for reversed-phase and per aqueous capillary electrochromatography
Source: Royal Society of Chemistry journal article supplement (doi:10.1039/c5ay00611b), 2015-01-01
Supplement: c5ay00611b1.pdf [file c5ay00611b1.pdf]

## Electronic Supplementary Information for

### Preparation and application of a novel mixed-mode monolith for reversed-phase and per aqueous capillary electrochromatography

*Sheng Tang,<sup>ab</sup> Yong Guo,<sup>a</sup> Xiaojing Liang,<sup>a</sup> Falin Wei,<sup>c</sup> Limin Yang,<sup>c</sup> Shujuan Liu,<sup>\*a</sup>  
Xia Liu,<sup>\*a</sup> Shengxiang Jiang<sup>a</sup>*

a Key Laboratory of Chemistry of Northwestern Plant Resources, CAS and Key Laboratory for Natural Medicine of Gansu Province, Lanzhou Institute of Chemical Physics, Chinese Academy of Sciences, Lanzhou 730000, China

b University of Chinese Academy of Sciences, Chinese Academy of Sciences, Beijing 100049, China

c Key Laboratory of Oil & Gas Production, China National Petroleum Corporation (CNPC) and Research Institute of Petroleum Exploration and Development (RIPED), Beijing 100083, China

\*Corresponding authors:

Shujuan Liu (S. Liu), E-mail Address: [liusj@licp.cas.cn](mailto:liusj@licp.cas.cn)

Tel: +86 931 4968272 Fax: +86 931 8277088

Xia Liu (X. Liu), E-mail Address: [gsliuxia@lzb.ac.cn](mailto:gsliuxia@lzb.ac.cn)

Tel: +86 931 4968203 Fax: +86 931 8277088

## Calculations

(1). The retention factor ( $k'$ ) was calculated using the following equation [1-4]:

$$k' = \frac{t_m \left(1 + \frac{\mu_{ep}}{i_{open}}\right) - t_0}{\frac{\mu_{eo}^*}{i_{monolith}}} \cdot t_0$$

where  $t_0$  and  $t_m$  are the retention time of the charged analyte and the EOF marker, respectively;  $\mu_{ep}$  is the electrophoretic mobility of the charged analyte;  $\mu_{eo}$  is the actual “interstitial” electroosmotic mobility of the eluent in the monolithic column. The value of  $\mu_{eo}$  is obtained by multiplying the “apparent” electroosmotic mobility  $\mu_{eo}^*$  of the monolith by the tortuosity factor of the column. This tortuosity factor is determined from the ratio of the currents observed in the CZE ( $i_{open}$ ) and CEC ( $i_{monolith}$ ) modes for the same running conditions [3].

For a neutral analyte,  $\mu_{eo} = 0$ , and thus the  $k'$  of the neutral analytes could be expressed by the following equation:

$$k' = \frac{t_m - t_0}{t_0}$$

(2). The linear flow velocity of EOF ( $v_{EOF}$ ) was calculated using the following equation:

$$v_{EOF} = \frac{L_e}{t_0}$$

where  $L_e$  is the effective length of the monolithic column;  $t_0$  is the retention time of the EOF marker.

(3). The electroosmotic mobility ( $\mu_{EOF}$ ) was calculated using the following equation [5]:

$$\mu_{EOF} = \frac{v_{EOF}}{E}$$

where  $E$  is the electric field strength.

According to the equation (2),  $\mu_{EOF}$  could be expressed by the following equation [6]:

$$\mu_{EOF} = \frac{v_{EOF}}{E} = \frac{L_e/t_0}{E} = \frac{L_e L_t}{t_0 V}$$

where  $L_e$  and  $L_t$  are the effective length and the total length of the monolithic column, respectively;  $t_0$  is the retention time of the EOF marker;  $V$  is the applied voltage.

(4). The plate height ( $H$ ) was calculated using the following equation:

$$H = \frac{L_e}{N}$$

where  $L_e$  is the effective length of the monolithic column,  $N$  is the theoretical plate number.

## References

1. A. S. Rathore and C. Horváth, *Electrophoresis*, 2002, **23**, 1211-1216.
2. A. S. Rathore, E. Wen and C. Horvath, *Anal. Chem.*, 1999, **71**, 2633-2641.
3. D. Allen and Z. El Rassi, *Electrophoresis*, 2003, **24**, 408-420.
4. J. He, X. Wang, M. Morill and S. A. Shamsi, *Anal. Chem.*, 2012, **84**, 5236-5242.
5. A. Van De Goor, B. Wanders and F. Everaerts, *J. Chromatogr. A*, 1989, **470**, 95-104.
6. N. J. Benz and J. S. Fritz, *HRC-J. High Resolut. Chromatogr.*, 1995, **18**, 175-178.

## Characterization

The quantitative evaluation of 4,5-imidazoledicarboxylic acid on the surface of the IDS monolithic matrix was also made by using the following equation: the coverage of imidazolium groups ( $\mu\text{mol m}^{-2}$ ) =  $(N\% \times 10^4) / (28 \times S)$ , where N% represents the percentage of nitrogen as determined by elemental analysis (1.58%), S is the specific surface area of the IDS hybrid monolith ( $634.84 \text{ m}^2 \text{ g}^{-1}$ ). The average content of the bonded 4,5-imidazoledicarboxylic acid on the surface of the monolith was calculated to be  $0.89 \mu\text{mol m}^{-2}$ .

## Figures

**Fig. S-1.** Effect of ACN content on the retention of nucleosides and nucleotide bases on the IDS hybrid monolithic column. Conditions: 20 mM  $\text{NaH}_2\text{PO}_4$  buffer at pH 3.0 with different ACN contents; applied voltage, -15 kV; detection wavelength, 214 nm.

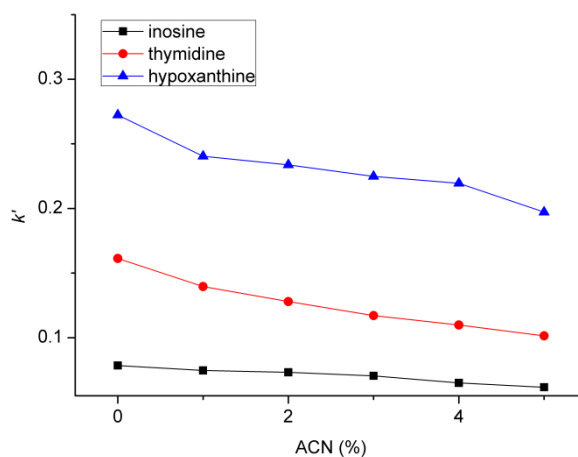

**Fig. S-2.** Effect of mobile phase pH on the retention of nucleosides and nucleotide bases on the IDS hybrid monolithic column. Conditions: 10 mM  $\text{NaH}_2\text{PO}_4$  buffer at different pH; applied voltage, -15 kV; detection wavelength, 214 nm.

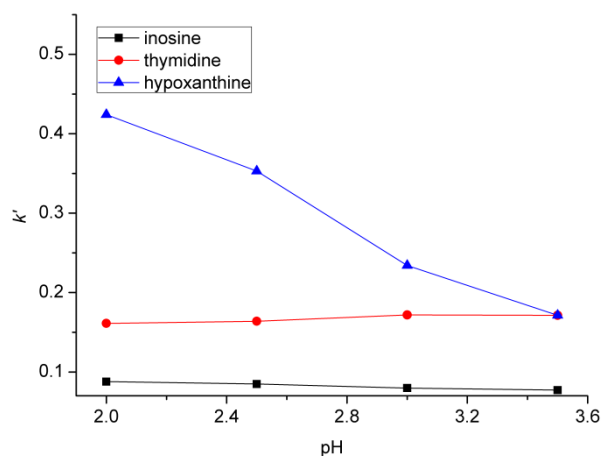

**Fig. S-3.** Effect of ACN content on the retention of amino acids on the IDS hybrid monolithic column. Conditions: 10 mM NaH<sub>2</sub>PO<sub>4</sub> buffer at pH 3.0 with different ACN contents; applied voltage, -20 kV; detection wavelength, 214 nm.

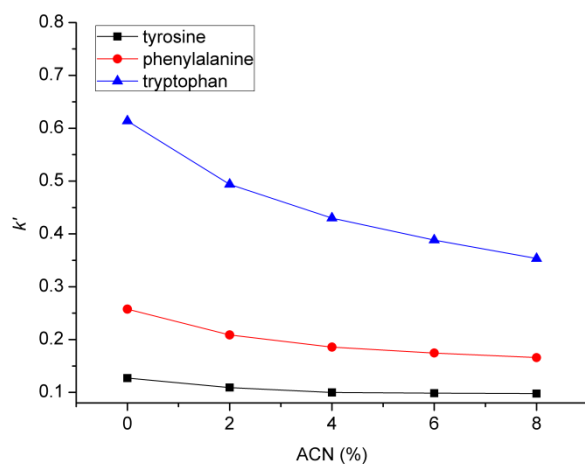

**Fig. S-4.** Effect of buffer concentration on the retention of amino acids on the IDS hybrid monolithic column. Conditions: various buffer concentrations at pH 3.0; applied voltage, -20 kV; detection wavelength, 214 nm.

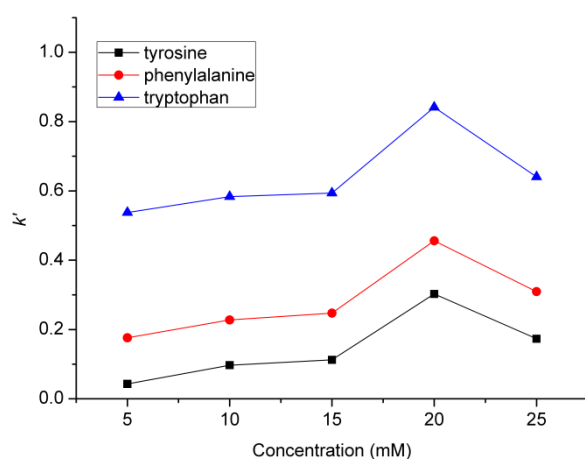

**Fig. S-5.** Effect of mobile phase pH on the retention of amino acids on the IDS hybrid monolithic column. Conditions: 10 mM NaH<sub>2</sub>PO<sub>4</sub> buffer at different pH; applied voltage, -20 kV; detection wavelength, 214 nm.

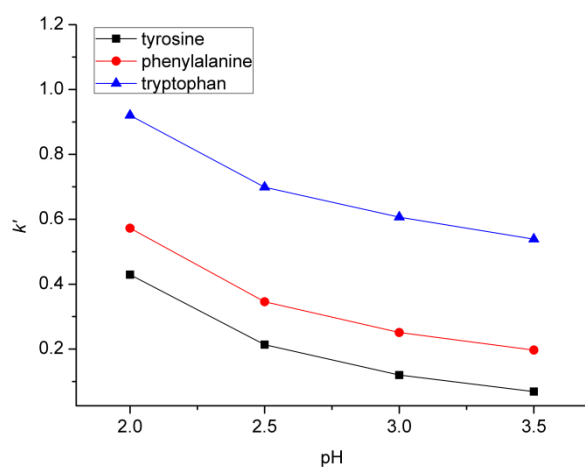

**Fig. S-6.** Effect of ACN content on the retention of phenols on the IDS hybrid monolithic column. Conditions: 10 mM NaH<sub>2</sub>PO<sub>4</sub> buffer at pH 3.0 with different ACN contents; applied voltage, -20 kV; detection wavelength, 214 nm.

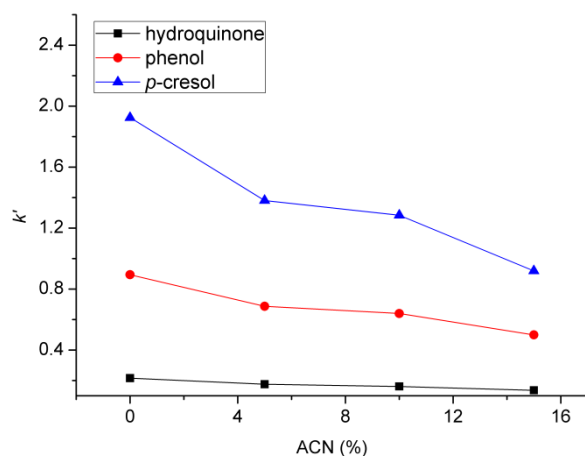

**Fig. S-7.** Effect of buffer concentration on the retention of phenols on the IDS hybrid monolithic column. Conditions: various buffer concentrations at pH 3.0; applied voltage, -20 kV; detection wavelength, 214 nm.

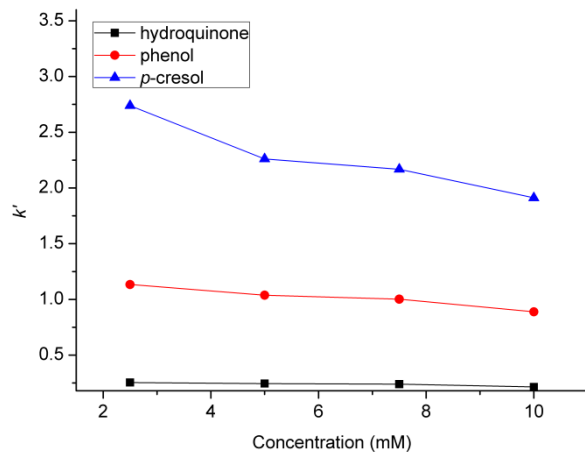

## Tables

**Table S-1.** Retention factors ( $k'$ ) and column efficiencies ( $N\ m^{-1}$ ) for nucleoside and nucleotide bases at various phosphate concentrations under the PACEC mode.

| Solute       | 5 mM  |                   | 10 mM |                   | 15 mM |                   |
|--------------|-------|-------------------|-------|-------------------|-------|-------------------|
|              | $k'$  | N m <sup>-1</sup> | $k'$  | N m <sup>-1</sup> | $k'$  | N m <sup>-1</sup> |
| inosine      | 0.073 | 98 500            | 0.081 | 124 600           | 0.089 | 128 800           |
| thymidine    | 0.158 | 78 300            | 0.155 | 100 800           | 0.151 | 104 500           |
| hypoxanthine | 0.265 | 124 000           | 0.422 | 135 500           | 0.645 | 118 000           |

**Table S-2.** Column efficiencies (N m<sup>-1</sup>) for amino acids at different phosphate concentrations in the mobile phase under the PACEC mode.

| Concentration (mM) | L-tyrosine | D,L-phenylalanine | L-tryptophan |
|--------------------|------------|-------------------|--------------|
| 5                  | 45 500     | 34 800            | 16 300       |
| 15                 | 69 800     | 45 800            | 21 500       |
| 25                 | 80 300     | 55 000            | 31 800       |

**Table S-3.** Column efficiencies (N m<sup>-1</sup>) for amino acids at different pHs under the PACEC mode.

| pH  | L-tyrosine | D,L-phenylalanine | L-tryptophan |
|-----|------------|-------------------|--------------|
| 2.5 | 82 500     | 52 500            | 25 300       |
| 3.0 | 79 300     | 49 300            | 24 000       |
| 3.5 | 72 500     | 47 000            | 23 500       |

**Table S-4.** Column efficiencies (N m<sup>-1</sup>) for benzoic acid derivatives with different ACN contents in the mobile phase.

| Solute                        | 0%     | 5%     | 10%    | 15%    | 20%    |
|-------------------------------|--------|--------|--------|--------|--------|
| <i>p</i> -hydroxybenzoic acid | 11 500 | 23 100 | 28 700 | 40 400 | 44 200 |
| <i>p</i> -aminobenzoic acid   | 13 100 | 27 400 | 31 000 | 46 000 | 49 500 |
| benzoic acid                  | 3 600  | 6 300  | 7 300  | 11 100 | 13 200 |

**Table S-5.** Column efficiencies (N m<sup>-1</sup>) for benzoic acid derivatives at different pHs.

| Solute                        | 2.5    | 3.0    | 3.5    | 4.0    | 4.5   |
|-------------------------------|--------|--------|--------|--------|-------|
| <i>p</i> -hydroxybenzoic acid | 31 300 | 29 000 | 25 300 | 14 800 | 8 000 |
| <i>p</i> -aminobenzoic acid   | 37 500 | 33 000 | 25 500 | 12 500 | 7 300 |
| benzoic acid                  | 10 000 | 9 300  | 7 500  | 3 800  | 1 800 |

**Table S-6.** Retention factors ( $k'$ ) and column efficiencies (N m<sup>-1</sup>) for benzoic acid derivatives at different phosphate concentrations in the mobile phase.

| Solute                        | 5 mM |                   | 15 mM |                   | 25 mM |                   |
|-------------------------------|------|-------------------|-------|-------------------|-------|-------------------|
|                               | $k'$ | N m <sup>-1</sup> | $k'$  | N m <sup>-1</sup> | $k'$  | N m <sup>-1</sup> |
| <i>p</i> -hydroxybenzoic acid | 0.43 | 60 000            | 0.25  | 116 300           | 0.17  | 145 000           |



|                                   |      |        |      |         |      |         |
|-----------------------------------|------|--------|------|---------|------|---------|
| <b><i>p</i>-aminobenzoic acid</b> | 0.47 | 40 500 | 0.45 | 126 000 | 0.34 | 130 500 |
| <b>benzoic acid</b>               | 1.05 | 6 000  | 0.62 | 27 500  | 0.39 | 39 500  |

---
